# Supplementary material for: Sustainable food packaging using modified SiO2 nanofillers in biodegradable polymers
Source: Royal Society of Chemistry journal article supplement (doi:10.1039/d4qm00206g), 2024-01-01
Supplement: d4qm00206g1.pdf [file d4qm00206g1.pdf]

## Supporting information

# Sustainable Food Packaging Using Modified SiO<sub>2</sub> Nanofillers in Biodegradable Polymers

**Mikhail Koreshkov<sup>1</sup>✉, Sebastian J. Antreich<sup>1</sup>, Alexander Bismarck<sup>2</sup>, Ines Fritz<sup>3</sup>, Erik Reimhult<sup>1</sup>, Yuuki Takatsuna<sup>1</sup>, and Ronald Zirbs<sup>1</sup> ✉**

<sup>1</sup>Department of Bionanosciences, University of Natural Resources and Life Sciences (BOKU), Vienna, Austria. ✉  
e-mail: mikhail.koreshkov@boku.ac.at, ronald.zirbs@boku.ac.at.

<sup>2</sup>Institute of Material Chemistry and Research, Polymer and Composite Engineering (PaCE) Group, Faculty of Chemistry, University of Vienna, Vienna, Austria

<sup>3</sup>Department of Agrobiotechnology, Institute of Environmental Biotechnology, University for Natural Resources and Life Sciences (BOKU), IFA-Tulln, Tulln, Austria

Number of pages: 09

Number of figures: 06

Number of tables: 01

## Scanning electron microscopy (SEM)

SEM was performed to observe microstructural features of composite films, which were prepared for the gas permeability test. Composite films were immersed in liquid nitrogen for 30 minutes, then broken manually by bending. High-vacuum secondary electron imaging of the fractured surface was performed using an Aprea VS SEM (Thermo Scientific, the Netherlands) at an acceleration voltage of 1 kV.

## Differential Scanning Calorimetry

The thermal behavior of the nanocomposites was measured using the differential scanning calorimeter (DSC) under nitrogen atmosphere. The samples of  $8.5 \pm 0.5$  mg were heated from 20 to 190°C and kept under isothermal conditions at 190°C for 3 min to eliminate the thermal history. Then the samples were cooled to 20°C and finally were reheated to 190°C. The cooling and heating rate was  $10^\circ\text{C}\cdot\text{min}^{-1}$ . The cooling and second heating curves were recorded. For each sample, the reported value is the average of three measurements. The crystallinity ( $\chi_c$ ) of the PHBV and PLLA phases was calculated by:

$$\chi_c (\%) = \left( \frac{\Delta H_m - \Delta H_{cc}}{\Delta H_m^0 \times w_f} \right) \times 100\%$$

where  $\Delta H_m$  is the melting enthalpy,  $\Delta H_{cc}$  is the cold crystallization enthalpy,  $w_f$  belongs to the weight fraction of polymer and  $\Delta H_m^0$  is the melting enthalpy of completely crystallized polymer (100% crystalline). For PLLA  $\Delta H_m^0 = 93 \text{ J/g}^1$  and for PHBV due to low content of HV the theoretical fusion enthalpy  $\Delta H_m^0$  is chosen as  $146 \text{ J/g}$ , which corresponds to 100% crystalline PHB<sup>2</sup>.

## Water uptake

To examine the water uptake, samples were dried for 72h, then immediately weighed ( $W_0$ ) and immersed in 80 ml of MilliQ water at  $23.1 \pm 0.1$  °C for 14 days. After every 24h, the samples were taken out from water, dried surface with tissue, and weighed ( $W_1$ ) using an electronic semi-microbalance Sartorius R160P (Sartorius GmbH, Goettingen, Germany). For each sample the reported value is the average of five tests. The water absorption ( $W_a$ ) of the samples was calculated with the following equation<sup>3</sup> :

$$Wa = \frac{W_1 - W_0}{W_0} \times 100\%$$

### **Biodegradation tests**

In order to evaluate the biodegradation properties of the filler and nanocomposites, a four-stage research scheme was implemented in accordance with the general recommendations of EN 13432 standard, which provides guidelines for test selection and test parameter design. Therefore, for the purpose of this study only the (idealized) biodegradation test according to OECD 301B (modified Sturm test) was required. All biodegradation test were set up as aquatic aerobic biodegradation test. We used the mineral medium as recommended in 500 mL glass bottles (Shott) equipped with the fitting gas washing unit. Test volume was 400 mL plus 10 mL of an mixed bacteria inoculum plus the amount of reference or test substance which was equivalent to ca. 0.3 to 0.6 g carbon. The carbon content of the substances was determined by element analysis with the photo-oxidation principle. Inocula were either enriched sewage sludge (settled for four hours, supernatant decanted and residue with roughly 2-3 % dry solid matter used) for mesophilic test conditions or an elutriate from organic waste compost (by suspending active compost in warm tap water, removing stones and swimming particles and using the rest as it is) for thermophilic test conditions. Each test setup consisted of a blanc, a reference substance and any number of test substance, each of them in threefold replicates. In case of limited sample amounts, only twofold determinations were done.

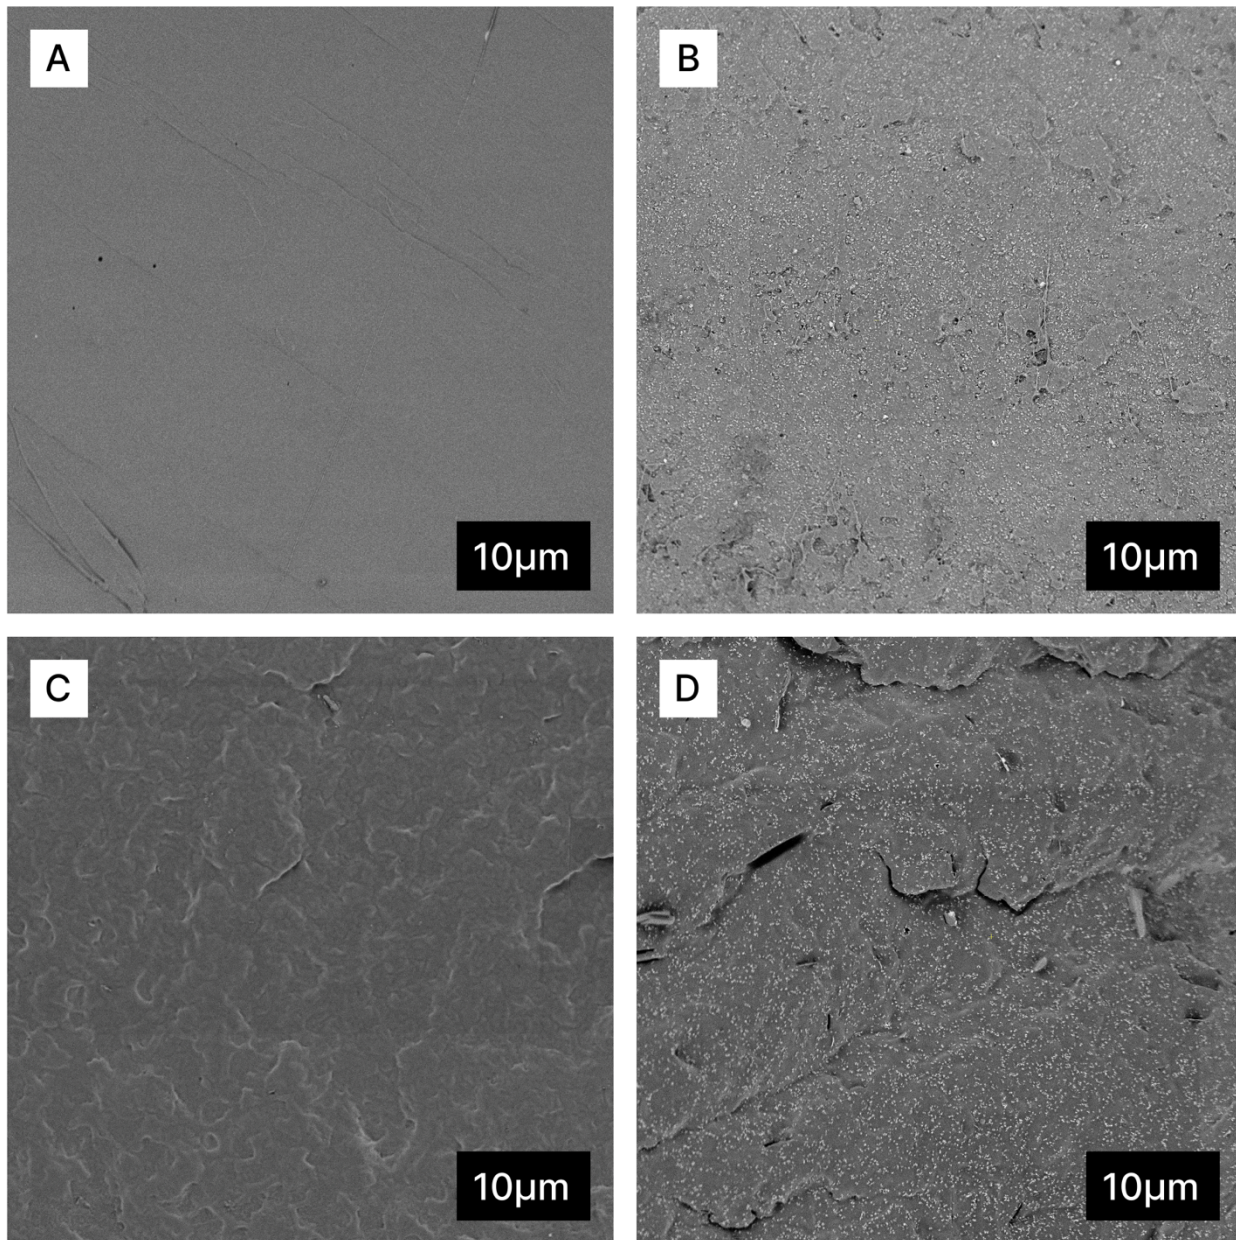

*Figure S1. SEM micrographs of cryogenically fractured films of (A) PLLA, (B) PLLA/OLLA-g-SiO<sub>2</sub>, (C) PHBV and (D) PHBV/OLLA-g-SiO<sub>2</sub>.*

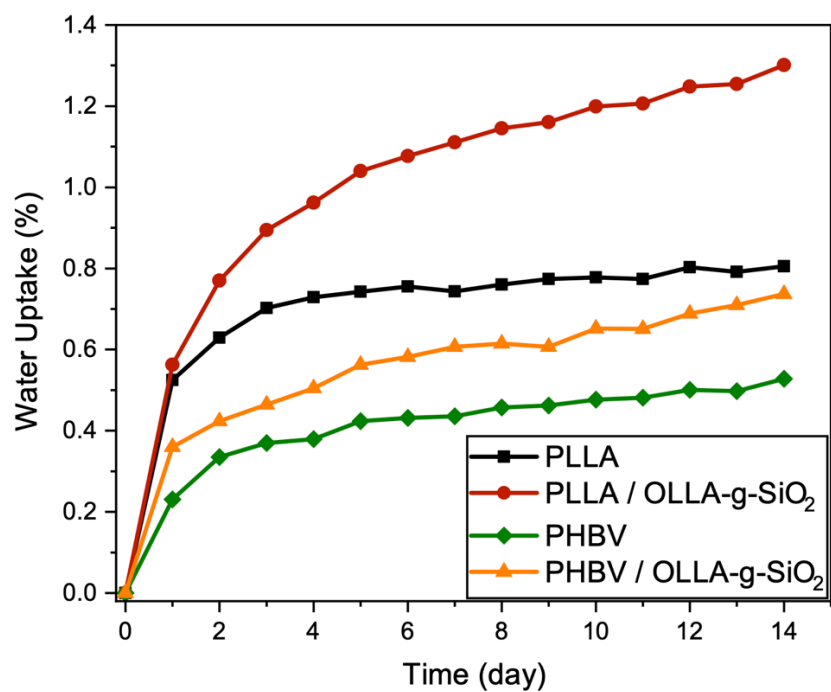

Figure S2. Water absorption profiles for PLLA, PLLA/OLLA-g- SiO<sub>2</sub>, PHBV and PHBV/OLLA-g-SiO<sub>2</sub> at 23 °C.

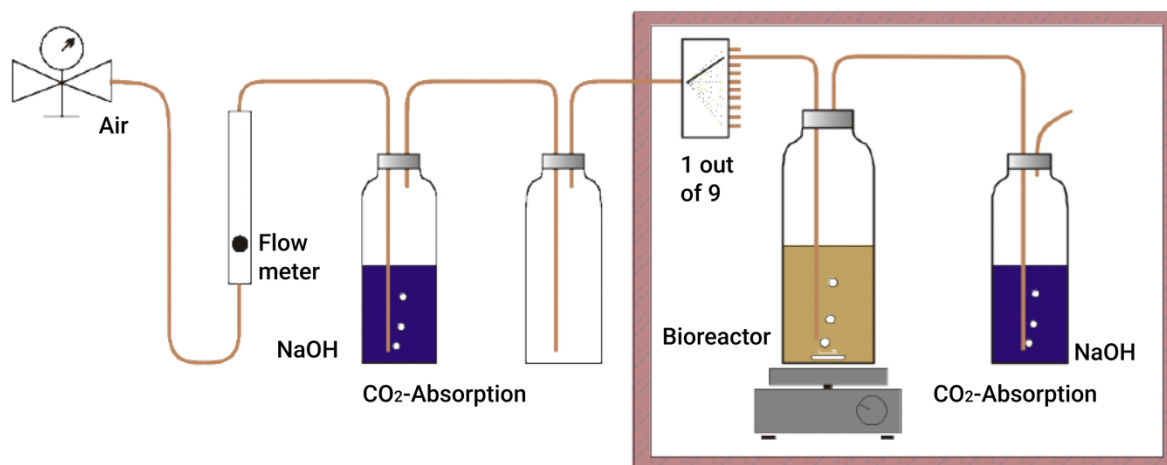

Figure S3: General setup of the biodegradation tests according to OECD 301B, the temperature of bioreactor was set to either 22°C or to 58°C.

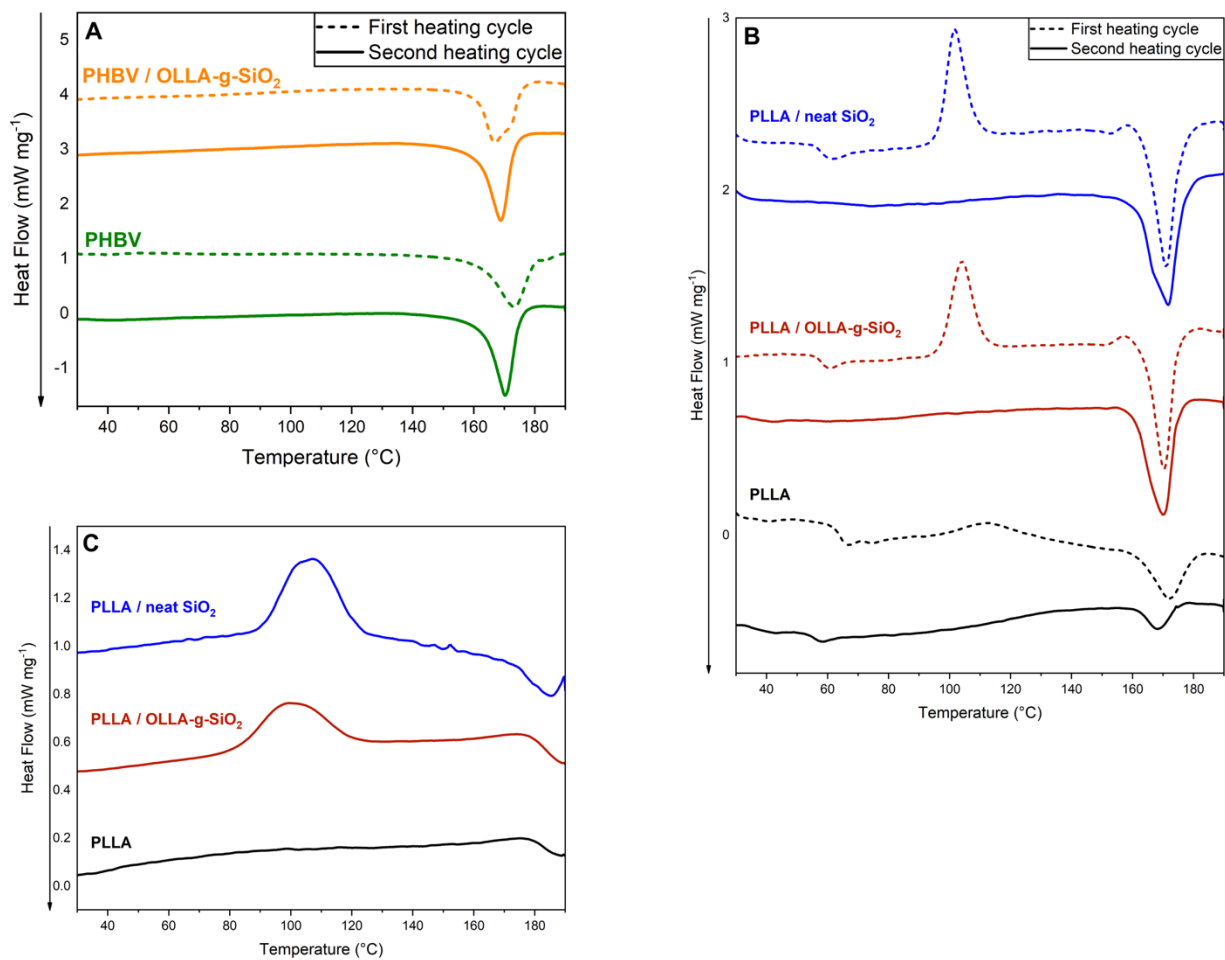

Figure S4. Differential scanning calorimetry (DSC) for PHBV and PHBV/OLLA-g- SiO<sub>2</sub> (A), PLLA, PLLA/OLLA-g-SiO<sub>2</sub> and PLLA/neat SiO<sub>2</sub> (B) and cooling cycle for PLLA, PLLA/OLLA-g-SiO<sub>2</sub> and PLLA/neat SiO<sub>2</sub> (C)

Table S1. Thermal characteristics of PLLA and PHBV and their nanocomposites.

| Sample                                       | $w_f$<br>(%) | First heating cycle |                       |                 | Second heating cycle |                       |                 |
|----------------------------------------------|--------------|---------------------|-----------------------|-----------------|----------------------|-----------------------|-----------------|
|                                              |              | $T_{m1}$ (°C)       | $\Delta H_{m1}$ (J/g) | $\chi_{c1}$ (%) | $T_{m2}$ (°C)        | $\Delta H_{m2}$ (J/g) | $\chi_{c2}$ (%) |
| <b>PLLA</b>                                  | 100          | 171.7<br>$\pm 0.6$  | $5.8 \pm 0.4$         | 6.2             | 169.4<br>$\pm 0.7$   | $7.3 \pm 0.2$         | 7.8             |
| <b>PLLA/<br/>OLLA-g-<br/>SiO<sub>2</sub></b> | 95           | 171.9<br>$\pm 0.3$  | $8.1 \pm 1.7$         | 9.2             | 171.4<br>$\pm 0.9$   | $35.1 \pm 0.9$        | 39.7            |
| <b>PLLA/<br/>SiO<sub>2</sub></b>             | 95           | 171.4<br>$\pm 0.3$  | $8.5 \pm 0.9$         | 9.7             | 171.6<br>$\pm 0.5$   | $39.3 \pm 3.2$        | 44.5            |
| <b>PHBV</b>                                  | 98.5         | 172.6<br>$\pm 0.7$  | $75 \pm 2.4$          | 52.0            | 170.4<br>$\pm 0.5$   | $88 \pm 1.1$          | 61.3            |
| <b>PHBV/<br/>OLLA-g-<br/>SiO<sub>2</sub></b> | 93.6         | 170.6<br>$\pm 0.5$  | $66 \pm 2.5$          | 48.3            | 171<br>$\pm 1.2$     | $90 \pm 1.3$          | 66.1            |



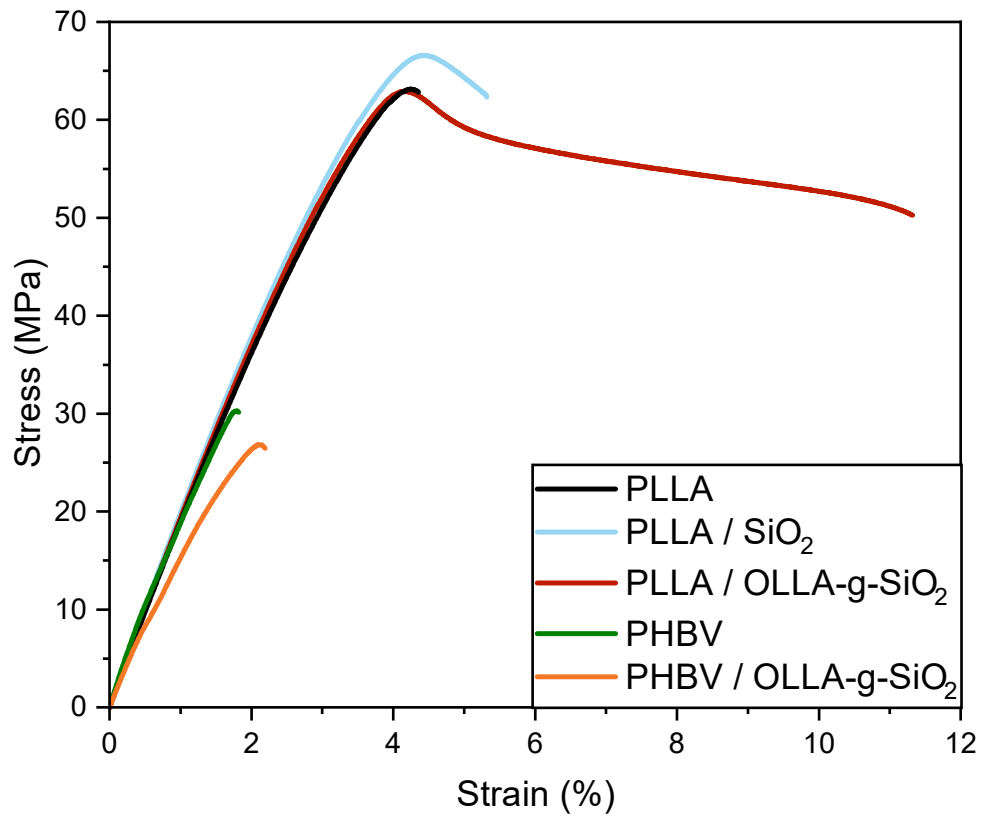

Figure S5. Stress-strain curves for PLLA, PLLA/SiO<sub>2</sub>, PLLA/OLLA-g-SiO<sub>2</sub>, PHBV and PHBV/OLLA-g-SiO<sub>2</sub>

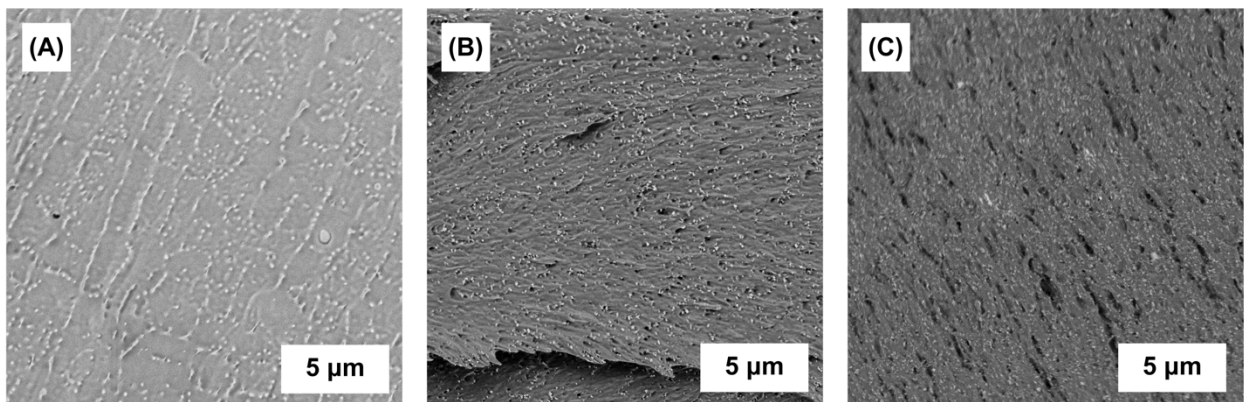

Figure S6. SEM micrographs of "dogbone" specimens after tensile tests of (A) PLLA, (B) PLLA/unmodified SiO<sub>2</sub>, (C) PLLA/OLLA-g-SiO<sub>2</sub>.



## References

- 1 E. W. Fischer, H. J. Sterzel and G. Wegner, *Kolloid-Zeitschrift & Zeitschrift für Polymere*, 1973, **251**, 980–990.
- 2 P. J. Barham, A. Keller, E. L. Otun and P. A. Holmes, *J Mater Sci*, 1984, **19**, 2781–2794.
- 3 X. Song, W. Guan, H. Qin, X. Han, L. Wu and Y. Ye, *Scientific Reports* |, 123AD, **12**, 11563.
